# Supplementary material for: The use of multi-criteria decision making models in evaluating anesthesia method options in circumcision surgery
Source: Springer Nature journal article supplement (doi:10.1186/s12911-017-0409-5), 2017-01-23
Supplement: MOESM1 [file 12014280]

Dear Sir/Madam,

This survey will be the main source of data that will be evaluated when we investigate the weights of the factors that are effective in the process of choosing anesthesia methods used in circumcision surgery in Turkey.

In the success of the questionnaire and therefore of our work, your involvement and your complete answers have a great proposition. The answers you provide on the questionnaire will be kept strictly confidential and no data will be shared about the individual and will not be used for any purpose other than our work.

We will be pleased to share with you the findings we obtained as a result of our work in the relevant area. Thank you very much for your interest and help in your work.

Best Regards,

Asst.Prof.Gulsah Hancerliogullari

e-mail: [gulsahhancerliogullari@gmail.com](mailto:gulsahhancerliogullari@gmail.com)

## Factors Affecting the Preference of Anesthesia Methods in Circumcision Surgery

1. Age : .....
2. Gender :  Male  Female
3. Institution:  Military hospital  Private hospital  University hospital  
 Educational research hospital  Public hospital
4. For many years you have been working as a pediatric surgeon? : .....
5. For many years, you have being performed circumcision surgery? : .....
6. When you think of the last 3 years, on average how many circumcision surgery did you perform per year? : .....
7. When you think of the last 3 years, on average how many general anesthesia with penile block did you perform per year? : .....
8. When you think of the last 3 years, on average how many general anesthesia without penile block did you perform per year? : .....
9. When you think of the last 3 years, on average how many general anesthesia with penile block did you perform per year? : .....
10. When you think of the last 3 years, on average how many local anesthesia did you perform per year? : .....

**Main criteria & sub-criteria**

Convenience related factors

- Convenience for patient
- Convenience for doctor

Reliability related factors

- Condition of penis
- Vital function

Duration related factors

- Duration of anesthesia method
- Duration of recovery

Psychology related factors

- Psychology of parent
- Psychology of patient

**Pairwise comparison evaluation method**

On the following pages, you will be asked to evaluate the effects of the factors that may affect "the choice of anesthesia methods used in circumcision surgery". During the mentioned evaluation; the factors will be compared on a pairwise basis and expressed on the scale given.

1. In the selection of anesthesia method for circumcision surgery, please judge the relative importance: How important is each element on the left (A) compared with each element on the right (B)?

**Example**

While evaluating the "convenience related factors" and "reliability related factors" in the first line, if I mark "HI" on the "convenience related factors" side, I would prefer to consider "convenience related factors" as "highly important" rather than "reliability related factors" when selecting the anesthesia method for circumcision surgery. Similarly, if you think that "convenience related factors" are equal to "reliability related factors", you should mark "E" in the middle.

|   |                               |                        |                               |   |
|---|-------------------------------|------------------------|-------------------------------|---|
| A | Column A compared to Column B | Equal importance level | Column B compared to Column A | B |
|---|-------------------------------|------------------------|-------------------------------|---|

E= Equal SI=Slightly Important FI=Fairly Important HI=Highly Important  
 VI= Very Important EI=Extremely Important

|             |    |    |    |    |    |   |    |    |    |    |    |             |
|-------------|----|----|----|----|----|---|----|----|----|----|----|-------------|
| Convenience | EI | VI | HI | FI | SI | E | SI | FI | HI | VI | EI | Reliability |
| Convenience | EI | VI | HI | FI | SI | E | SI | FI | HI | VI | EI | Duration    |
| Convenience | EI | VI | HI | FI | SI | E | SI | FI | HI | VI | EI | Psychology  |
| Reliability | EI | VI | HI | FI | SI | E | SI | FI | HI | VI | EI | Duration    |
| Reliability | EI | VI | HI | FI | SI | E | SI | FI | HI | VI | EI | Psychology  |

|          |  |    |    |    |    |    |   |    |    |    |    |    |  |            |
|----------|--|----|----|----|----|----|---|----|----|----|----|----|--|------------|
| Duration |  | EI | VI | HI | FI | SI | E | SI | FI | HI | VI | EI |  | Psychology |
|----------|--|----|----|----|----|----|---|----|----|----|----|----|--|------------|

2. In the selection of anesthesia method for circumcision surgery, when “convenience related factors” are considered only, please judge the relative importance: How important is each element on the left (A) compared with each element on the right (B)?

|   |                               |  |                        |  |                               |   |
|---|-------------------------------|--|------------------------|--|-------------------------------|---|
| A | Column A compared to Column B |  | Equal importance level |  | Column B compared to Column A | B |
|---|-------------------------------|--|------------------------|--|-------------------------------|---|

E= Equal SI=Slightly Important FI=Fairly Important HI=Highly Important  
VI= Very Important EI=Extremely Important

|                         |  |    |    |    |    |    |   |    |    |    |    |    |  |                        |
|-------------------------|--|----|----|----|----|----|---|----|----|----|----|----|--|------------------------|
| Convenience for patient |  | EI | VI | HI | FI | SI | E | SI | FI | HI | VI | EI |  | Convenience for doctor |
|-------------------------|--|----|----|----|----|----|---|----|----|----|----|----|--|------------------------|

3. In the selection of anesthesia method for circumcision surgery, when “reliability related factors” are considered only, please judge the relative importance: How important is each element on the left (A) compared with each element on the right (B)?

|   |                               |  |                        |  |                               |   |
|---|-------------------------------|--|------------------------|--|-------------------------------|---|
| A | Column A compared to Column B |  | Equal importance level |  | Column B compared to Column A | B |
|---|-------------------------------|--|------------------------|--|-------------------------------|---|

E= Equal SI=Slightly Important FI=Fairly Important HI=Highly Important  
VI= Very Important EI=Extremely Important

|                    |  |    |    |    |    |    |   |    |    |    |    |    |  |                |
|--------------------|--|----|----|----|----|----|---|----|----|----|----|----|--|----------------|
| Condition of penis |  | EI | VI | HI | FI | SI | E | SI | FI | HI | VI | EI |  | Vital function |
|--------------------|--|----|----|----|----|----|---|----|----|----|----|----|--|----------------|

4. In the selection of anesthesia method for circumcision surgery, when “duration related factors” are considered only, please judge the relative importance: How important is each element on the left (A) compared with each element on the right (B)?

|   |                                     |                                  |                                     |   |
|---|-------------------------------------|----------------------------------|-------------------------------------|---|
| A | Column A<br>compared to<br>Column B | Equal<br>importa<br>nce<br>level | Column B<br>compared to<br>Column A | B |
|---|-------------------------------------|----------------------------------|-------------------------------------|---|

E= Equal SI=Slightly Important FI=Fairly Important HI=Highly Important  
VI= Very Important EI=Extremely Important

|                                     |    |    |    |    |    |   |    |    |    |    |    |                         |
|-------------------------------------|----|----|----|----|----|---|----|----|----|----|----|-------------------------|
| Duration of<br>anesthesia<br>method | EI | VI | HI | FI | SI | E | SI | FI | HI | VI | EI | Duration of<br>recovery |
|-------------------------------------|----|----|----|----|----|---|----|----|----|----|----|-------------------------|

5. In the selection of anesthesia method for circumcision surgery, when “psychology related factors” are considered only, please judge the relative importance: How important is each element on the left (A) compared with each element on the right (B)?

|   |                                     |                              |                                     |   |
|---|-------------------------------------|------------------------------|-------------------------------------|---|
| A | Column A<br>compared to<br>Column B | Equal<br>importance<br>level | Column B<br>compared to<br>Column A | B |
|---|-------------------------------------|------------------------------|-------------------------------------|---|

E= Equal SI=Slightly Important FI=Fairly Important HI=Highly Important  
VI= Very Important EI=Extremely Important

|                         |    |    |    |    |    |   |    |    |    |    |    |                          |
|-------------------------|----|----|----|----|----|---|----|----|----|----|----|--------------------------|
| Psychology<br>of parent | EI | VI | HI | FI | SI | E | SI | FI | HI | VI | EI | Psychology<br>of patient |
|-------------------------|----|----|----|----|----|---|----|----|----|----|----|--------------------------|

|   |                                     |                              |                                     |   |
|---|-------------------------------------|------------------------------|-------------------------------------|---|
| A | Column A<br>compared to<br>Column B | Equal<br>importance<br>level | Column B<br>compared to<br>Column A | B |
|---|-------------------------------------|------------------------------|-------------------------------------|---|

E= Equal SI=Slightly Important FI=Fairly Important HI=Highly Important  
VI= Very Important EI=Extremely Important

6. Compare the priorities of the following anesthesia methods in terms of convenience for patient.

|                                                     |  |  |  |    |    |    |    |    |   |    |    |    |    |    |  |  |  |  |                                                  |
|-----------------------------------------------------|--|--|--|----|----|----|----|----|---|----|----|----|----|----|--|--|--|--|--------------------------------------------------|
| General<br>anesthesia<br>without<br>penile<br>block |  |  |  | EI | VI | HI | FI | SI | E | SI | FI | HI | VI | EI |  |  |  |  | General<br>anesthesia<br>with<br>penile<br>block |
| General<br>anesthesia<br>without<br>penile<br>block |  |  |  | EI | VI | HI | FI | SI | E | SI | FI | HI | VI | EI |  |  |  |  | Local<br>anesthesia                              |
| General<br>anesthesia<br>with<br>penile<br>block    |  |  |  | EI | VI | HI | FI | SI | E | SI | FI | HI | VI | EI |  |  |  |  | Local<br>anesthesia                              |

7. Compare the priorities of the following anesthesia methods in terms of convenience for doctor.

|                                                     |  |  |  |    |    |    |    |    |   |    |    |    |    |    |  |  |  |  |                                                  |
|-----------------------------------------------------|--|--|--|----|----|----|----|----|---|----|----|----|----|----|--|--|--|--|--------------------------------------------------|
| General<br>anesthesia<br>without<br>penile<br>block |  |  |  | EI | VI | HI | FI | SI | E | SI | FI | HI | VI | EI |  |  |  |  | General<br>anesthesia<br>with<br>penile<br>block |
| General<br>anesthesia<br>without<br>penile<br>block |  |  |  | EI | VI | HI | FI | SI | E | SI | FI | HI | VI | EI |  |  |  |  | Local<br>anesthesia                              |
| General<br>anesthesia<br>with<br>penile<br>block    |  |  |  | EI | VI | HI | FI | SI | E | SI | FI | HI | VI | EI |  |  |  |  | Local<br>anesthesia                              |

8. Compare the priorities of the following anesthesia methods in terms of condition of penis.

|                                         |  |  |  |    |    |    |    |    |   |    |    |    |    |    |  |  |  |                                      |
|-----------------------------------------|--|--|--|----|----|----|----|----|---|----|----|----|----|----|--|--|--|--------------------------------------|
| General anesthesia without penile block |  |  |  | EI | VI | HI | FI | SI | E | SI | FI | HI | VI | EI |  |  |  | General anesthesia with penile block |
| General anesthesia without penile block |  |  |  | EI | VI | HI | FI | SI | E | SI | FI | HI | VI | EI |  |  |  | Local anesthesia                     |
| General anesthesia with penile block    |  |  |  | EI | VI | HI | FI | SI | E | SI | FI | HI | VI | EI |  |  |  | Local anesthesia                     |

9. Compare the priorities of the following anesthesia methods in terms of vital function.

|                                         |  |  |  |    |    |    |    |    |   |    |    |    |    |    |  |  |  |                                      |
|-----------------------------------------|--|--|--|----|----|----|----|----|---|----|----|----|----|----|--|--|--|--------------------------------------|
| General anesthesia without penile block |  |  |  | EI | VI | HI | FI | SI | E | SI | FI | HI | VI | EI |  |  |  | General anesthesia with penile block |
| General anesthesia without penile block |  |  |  | EI | VI | HI | FI | SI | E | SI | FI | HI | VI | EI |  |  |  | Local anesthesia                     |
| General anesthesia with penile block    |  |  |  | EI | VI | HI | FI | SI | E | SI | FI | HI | VI | EI |  |  |  | Local anesthesia                     |



**10.** Compare the priorities of the following anesthesia methods in terms of duration of anesthesia method.

|                                         |  |  |  |    |    |    |    |    |   |    |    |    |    |    |  |  |  |                                      |
|-----------------------------------------|--|--|--|----|----|----|----|----|---|----|----|----|----|----|--|--|--|--------------------------------------|
| General anesthesia without penile block |  |  |  | EI | VI | HI | FI | SI | E | SI | FI | HI | VI | EI |  |  |  | General anesthesia with penile block |
| General anesthesia without penile block |  |  |  | EI | VI | HI | FI | SI | E | SI | FI | HI | VI | EI |  |  |  | Local anesthesia                     |
| General anesthesia with penile block    |  |  |  | EI | VI | HI | FI | SI | E | SI | FI | HI | VI | EI |  |  |  | Local anesthesia                     |

**11.** Compare the priorities of the following anesthesia methods in terms of duration of recovery.

|                                         |  |  |  |    |    |    |    |    |   |    |    |    |    |    |  |  |  |                                      |
|-----------------------------------------|--|--|--|----|----|----|----|----|---|----|----|----|----|----|--|--|--|--------------------------------------|
| General anesthesia without penile block |  |  |  | EI | VI | HI | FI | SI | E | SI | FI | HI | VI | EI |  |  |  | General anesthesia with penile block |
| General anesthesia without penile block |  |  |  | EI | VI | HI | FI | SI | E | SI | FI | HI | VI | EI |  |  |  | Local anesthesia                     |
| General anesthesia with penile block    |  |  |  | EI | VI | HI | FI | SI | E | SI | FI | HI | VI | EI |  |  |  | Local anesthesia                     |

12. Compare the priorities of the following anesthesia methods in terms of psychology of parent.

|                                         |  |  |  |    |    |    |    |    |   |    |    |    |    |    |  |  |  |  |                                      |
|-----------------------------------------|--|--|--|----|----|----|----|----|---|----|----|----|----|----|--|--|--|--|--------------------------------------|
| General anesthesia without penile block |  |  |  | EI | VI | HI | FI | SI | E | SI | FI | HI | VI | EI |  |  |  |  | General anesthesia with penile block |
| General anesthesia without penile block |  |  |  | EI | VI | HI | FI | SI | E | SI | FI | HI | VI | EI |  |  |  |  | Local anesthesia                     |
| General anesthesia with penile block    |  |  |  | EI | VI | HI | FI | SI | E | SI | FI | HI | VI | EI |  |  |  |  | Local anesthesia                     |

13. Compare the priorities of the following anesthesia methods in terms of psychology of patient.

|                                         |  |  |  |    |    |    |    |    |   |    |    |    |    |    |  |  |  |  |                                      |
|-----------------------------------------|--|--|--|----|----|----|----|----|---|----|----|----|----|----|--|--|--|--|--------------------------------------|
| General anesthesia without penile block |  |  |  | EI | VI | HI | FI | SI | E | SI | FI | HI | VI | EI |  |  |  |  | General anesthesia with penile block |
| General anesthesia without penile block |  |  |  | EI | VI | HI | FI | SI | E | SI | FI | HI | VI | EI |  |  |  |  | Local anesthesia                     |
| General anesthesia with penile block    |  |  |  | EI | VI | HI | FI | SI | E | SI | FI | HI | VI | EI |  |  |  |  | Local anesthesia                     |
